# Supplementary material for: Facile Fabrication of Superhydrophobic Copper-Foam and Electrospinning Polystyrene Fiber for Combinational Oil–Water Separation
Source: MDPI journal article supplement (doi:10.3390/polym11010097), 2019-01-08
Supplement: s1 [file s1]

# Supporting Information

## Facile Fabrication of Superhydrophobic Copper-foam and Electrospinning Polystyrene Fiber for Combinational Oil–Water Separation

Yu-Ping Zhang <sup>1,\*</sup>, Jing-Hua Yang <sup>1,2</sup>, Ling-Li Li <sup>1</sup>, Cheng-Xing Cui <sup>1</sup>, Ying Li <sup>1</sup>, Shan-Qin Liu <sup>1</sup>, Xiao-Mao Zhou <sup>2,\*</sup> and Ling-Bo Qu <sup>3</sup>

<sup>1</sup> Henan Institute of Science and Technology, Xinxiang 453000, China; (Y. -P. Z.); (J. -H. Y.); (L. -L. L.); (C. -X. C.); (Y. L.); (S. -Q. L.) chengxingcui@hist.edu.cn

<sup>2</sup> Hunan Academy of Agricultural Sciences, Changsha 410128, China; (X.-M. Z.)

<sup>3</sup> College of Chemistry and Molecular Engineering, Zhengzhou University, Henan 450001, China; (L. B. Q.) qulingbo@zzu.edu.cn

\* Correspondence: zhangyuping@hist.edu.cn (Y. -P. Z.); beijing2017xmz@163.com (X. -M. Z.)

**Scheme S1.** Illustration for the fabrication process of the superhydrophobic copper foams using 4 sulfhydryl compounds.

**Figure S1.** The images of etched copper foams after water washing in the presence of nitrogen blowing for drying (a) and absence of nitrogen blowing (b-d, after stay in 5-6 h). The etched process was carried out using 0.01g/ml FeCl<sub>3</sub> about 15min.

**Table S1.** The absorption capacity of gasoline engine oil using different concentration of FeCl<sub>3</sub>.

**Figure S2.** The Optimization of FeCl<sub>3</sub> (mg/mL) concentration in the chemical etching process.

**Figure S3.** SEM characterization of copper foams after modification by ODE ethanol solution with a different time of 5,10,15,20 and 25 min, respectively.

**Figure S4.** Change of absorption amount for CCl<sub>4</sub> using the as-prepared copper foam during 10 cycles.

**Figure S5.** Upper: SEM characterization of foam copper after modification of ODE immersed

about 12h in some rigid conditions. Below: The changes of WCAs in different rigid

conditions.

**Video 1:** Superhydrophobicity of Cu foams modified by EE, DE, HDE and ODE.

**Video 2:** Determination of the WSA with a sliding angle of  $0^{\circ}$ .

**Video 3:** Determination of the WSA with a sliding angle of  $5^{\circ}$ .

**Video 4:** Determination of the WSA with a sliding angle of  $10^{\circ}$ .

**Video 5:** Test to absorb the oil.

**Video 6:** Oil–water separation.

## Supplementary files

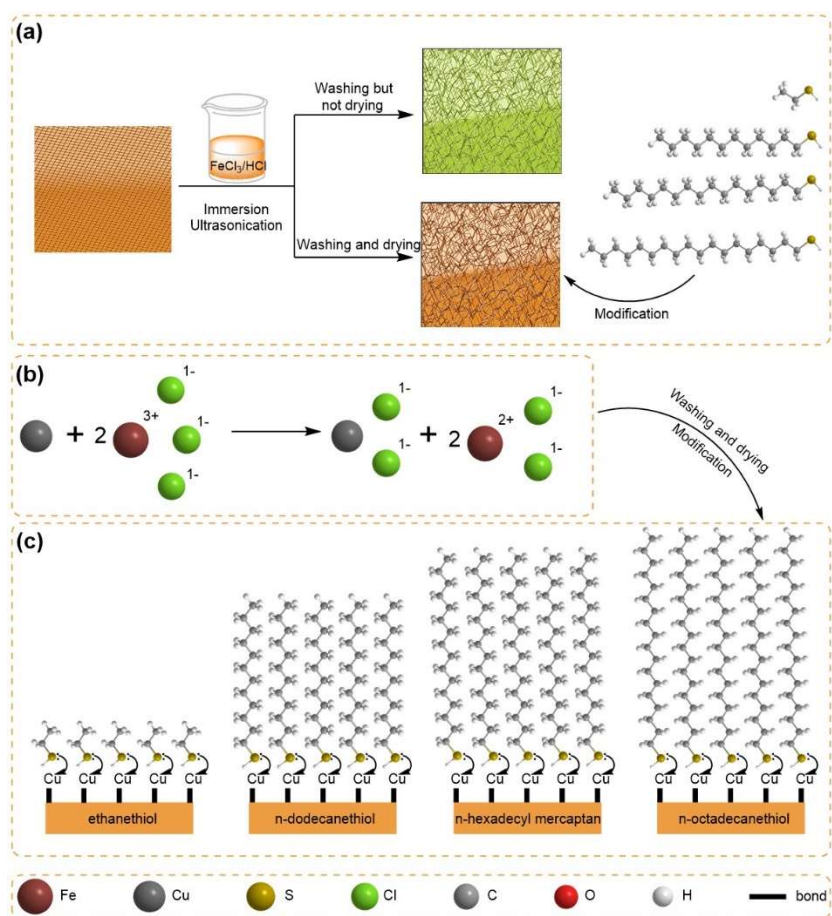

**Scheme S1.** Illustration for the fabrication process of the superhydrophobic copper foams using 4 sulfhydryl compounds.

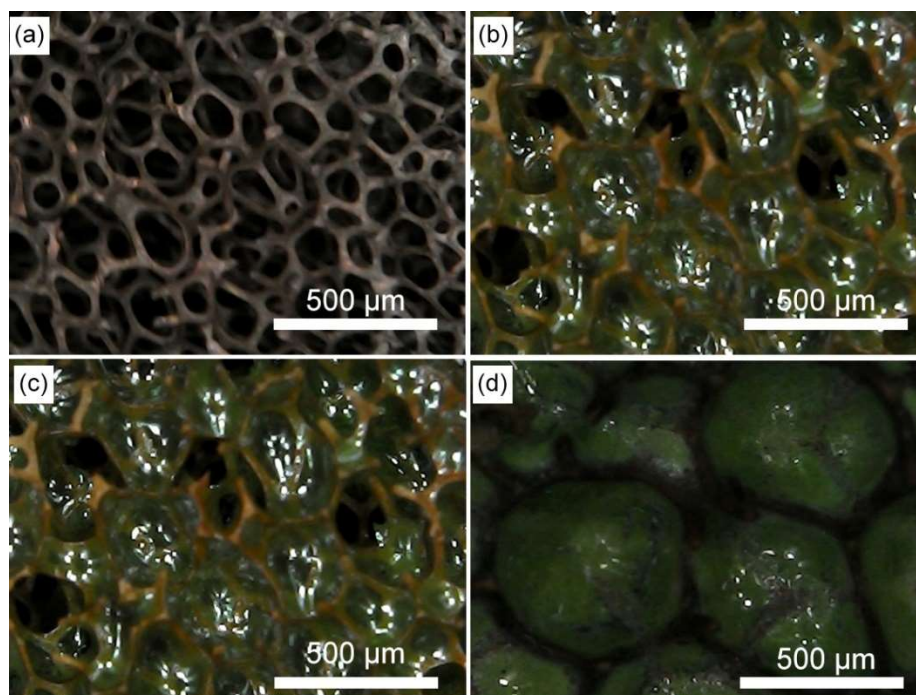

**Figure S1.** The images of etched Cu foams after water washing in the presence of nitrogen blowing for drying (a) and absence of nitrogen blowing (b-d, after stay in 5-6 h). The etched process was carried out using 0.01g/ml  $\text{FeCl}_3$  about 15min.

**Table S1.** The absorption capacity of gasoline engine oil using different concentration of FeCl<sub>3</sub>.

| C (mg /mL)          | 2.5   | 5     | 10    | 20  | 40 |
|---------------------|-------|-------|-------|-----|----|
| m <sub>1</sub> (mg) | 57.2  | 47.1  | 31.9  | 5.6 | 0  |
| m <sub>2</sub> (mg) | 275.9 | 227.5 | 201.8 | /   | /  |
| A <sub>c</sub>      | 3.8   | 3.8   | 5.3   | /   | /  |

The absorption capacity is calculated according to  $A_c = (m_2 / m_1) \times 100\%$ , where m<sub>1</sub> and m<sub>2</sub> were the Cu foam mass before and after absorbing the oil, respectively.

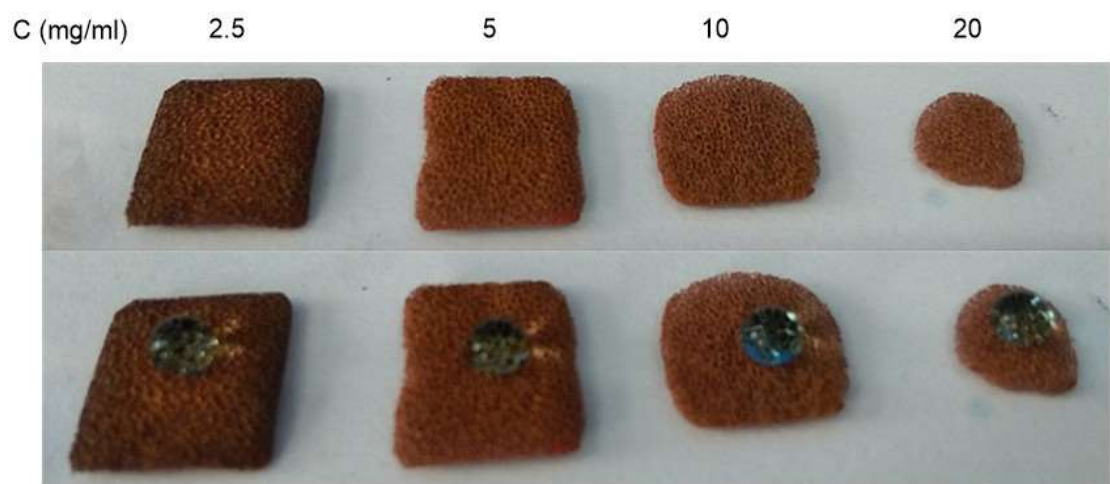

**Figure S2.** The Optimization of  $\text{FeCl}_3$  concentration in the chemical etching process.

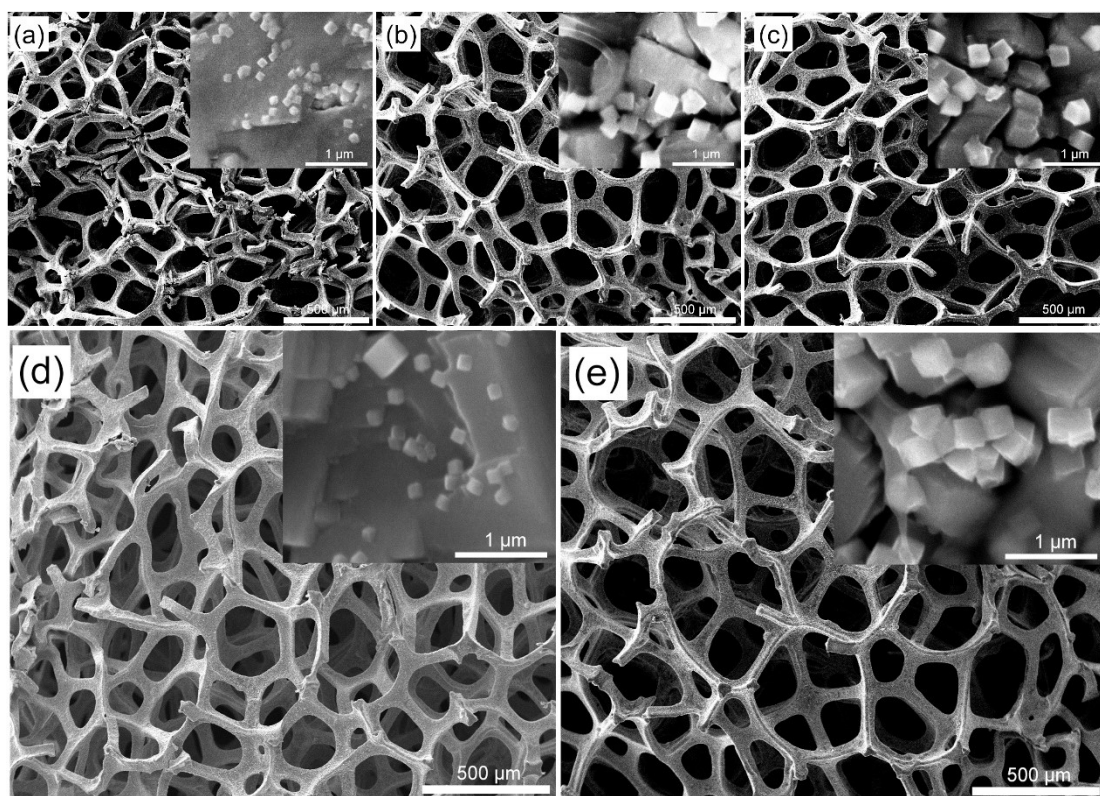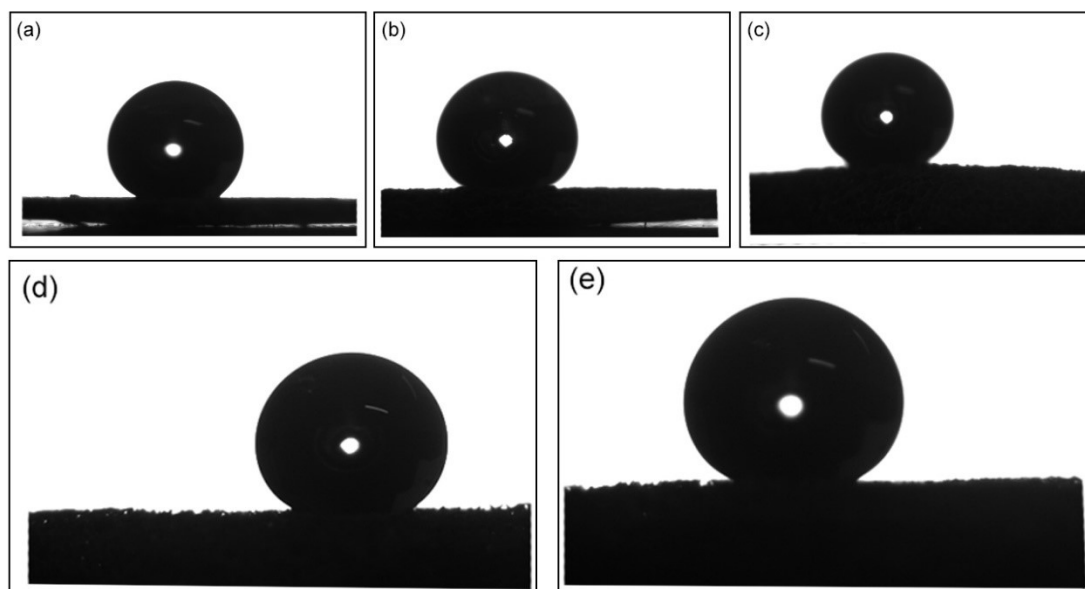

**Figure S3.** SEM characterization of copper foams after modification by 1 mM ODE ethanol solution with a different time of 5,10,15,20 and 25 min.

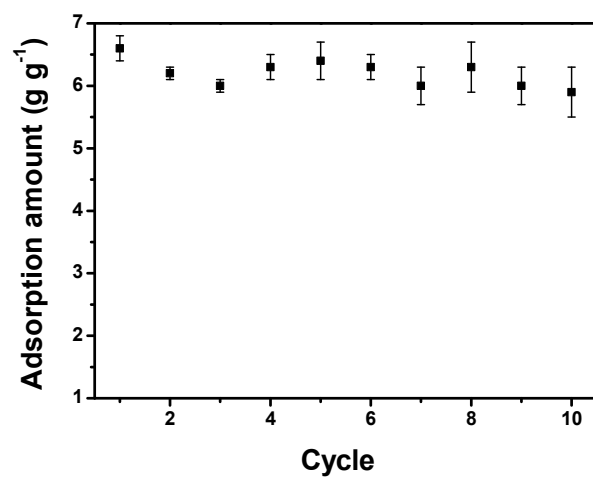

**Figure S4.** Change of absorption amount for CCl<sub>4</sub> using the as-prepared copper foam during 10 cycles.



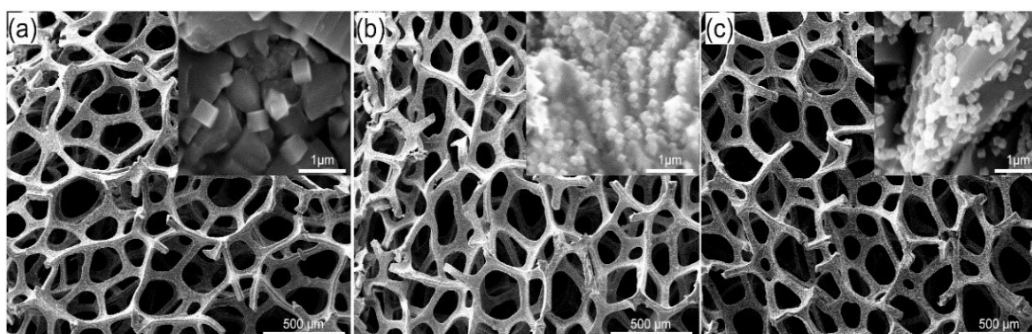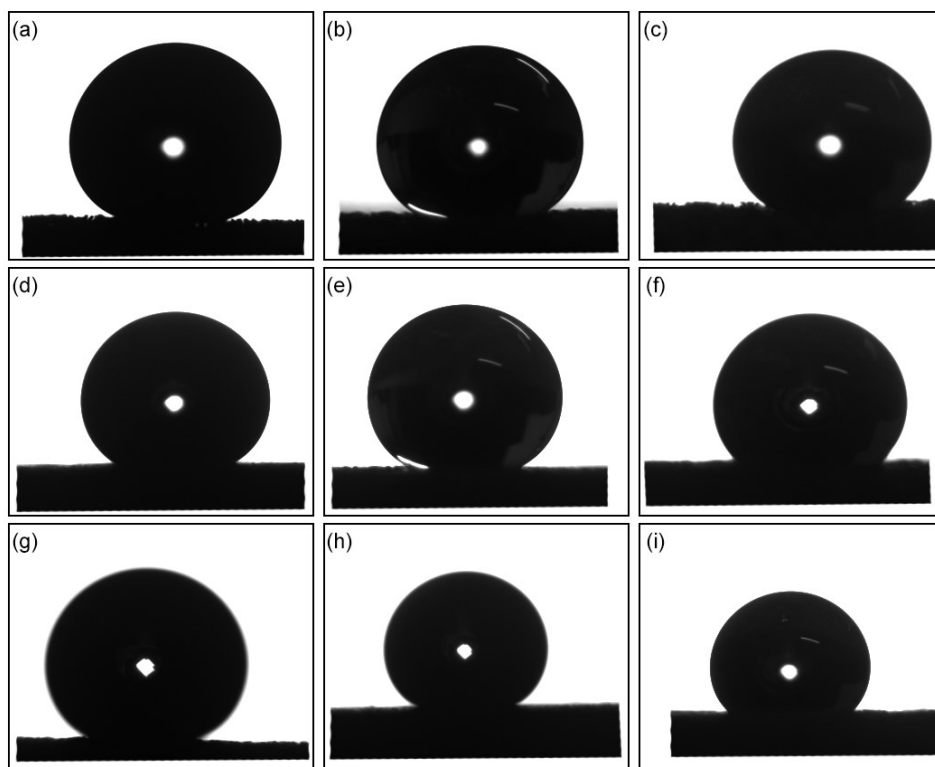

**Figure S5.** Upper : SEM characterization of foam copper after modification of ODE immersed about 12h in some rigid conditions. (a)-(c) stand for the condition of pH=1, pH=13 and 3.5% NaCl, respectively. Below: The changes of WCAs in different rigid conditions, (a)-(c) stand for the WCAs after the porous Cu is immersed about 5 min, 10 min and 12h, respectively, in a solution with a pH of 1. (d) - (f) stand for the WCAs after the porous Cu is immersed about 5 min, 10 min and 12h, respectively, in a solution with a pH of 13. (g) - (i) stand for the WCAs after the porous Cu is immersed about 5 min, 10 min and 12h, respectively, in a solution with a 3.5% NaCl.
